# Supplementary material
Source: PubMed Central journal article supplement (PMC11062839)
Supplement: NIHMS1955233-supplement-1.pdf [file NIHMS1955233-supplement-1.pdf]

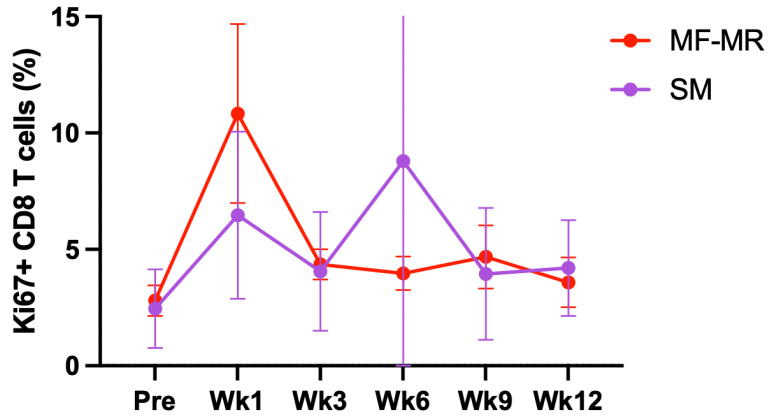

**Supplementary Figure S1. Analysis of Ki67+ CD8 T cells in peripheral blood.** The percentage of Ki67+ CD8 T cells in peripheral blood was assessed at the indicated times in patients with MF-MR (n=3) and SM (n=6). Error bars indicate standard deviations. Comparison of Ki67+ CD8 T cells at week 1, and the change in Ki67+ CD8 T cells between week 1 and baseline, for patients with MF-MR and SM were not significant ( $P > 0.05$ ). Statistical significance was assessed by a two-sided t-test.
