# Supplementary material
Source: PubMed Central journal article supplement (PMC11062839)
Supplement: NIHMS1955233-supplement-2.pdf [file NIHMS1955233-supplement-2.pdf]

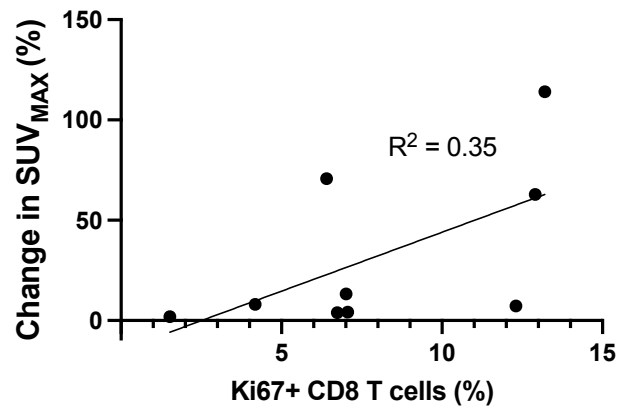

**Supplementary Figure S2. Change in SUV<sub>MAX</sub> versus percentage of Ki67+ CD8 T cells.** Scatterplot of the percentage change in tumor SUV<sub>MAX</sub> between PET0 and PET1, and percentage of Ki67+ CD8 T cells in the peripheral blood at the time of PET1. Linear regression fitting is indicated by the black line; coefficient of determination ( $R^2$ ) = 0.35.
