# Supplementary material
Source: PubMed Central journal article supplement (PMC11062839)
Supplement: NIHMS1955233-supplement-3.pdf [file NIHMS1955233-supplement-3.pdf]

### CD8 T cells

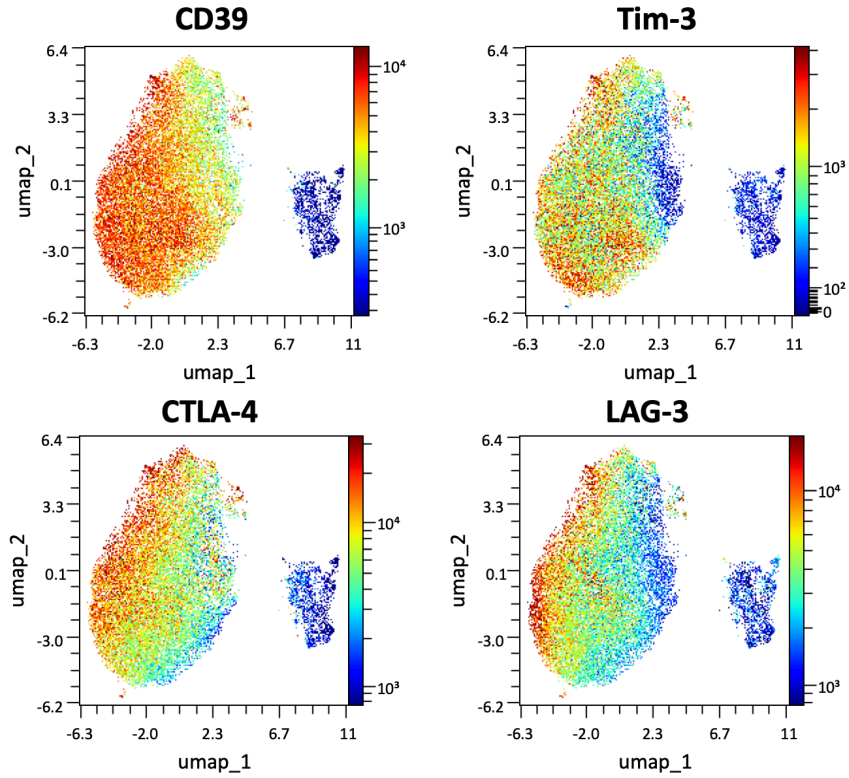

**Supplementary Figure S3. CD8 T cells from patient 5 display an exhausted phenotype.** Uniform Manifold Approximation and Projection (UMAP) representations of CD8 T cells from patient 5 demonstrate high expression of CD39, Tim-3, CTLA-4, and LAG-3, consistent with exhaustion.
