# Supplementary material
Source: PubMed Central journal article supplement (PMC11062839)
Supplement: NIHMS1955233-supplement-5.pdf [file NIHMS1955233-supplement-5.pdf]

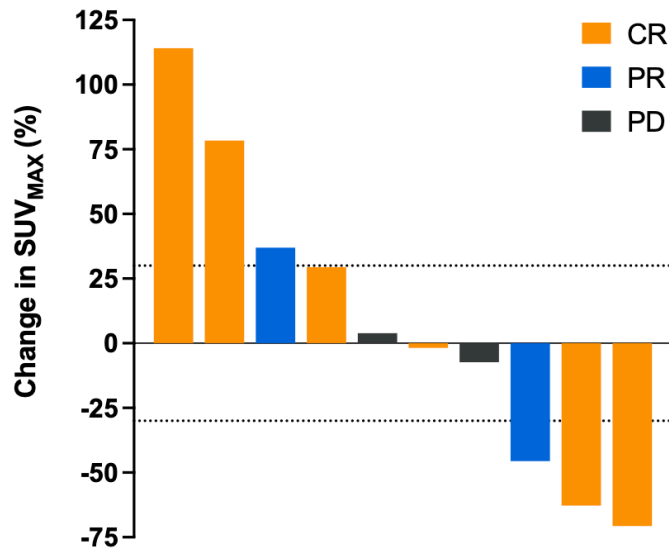

**Supplementary Figure S5. Change in SUV<sub>MAX</sub> in patients with <10 days between PET0 and therapy start.** Waterfall plot of change in tumor SUV<sub>MAX</sub> for patients with <10 days between their baseline FDG PET/CT scan (PET0) and treatment initiation, according to treatment response. Dotted lines represent +30% and -30% change in SUV<sub>MAX</sub>, respectively. SUV<sub>MAX</sub> = maximal standardized uptake value, CR = complete response, PR = partial response, PD = progressive disease.
