# Supplementary material
Source: PubMed Central journal article supplement (PMC11062839)
Supplement: NIHMS1955233-supplement-7.pdf [file NIHMS1955233-supplement-7.pdf]

|                                          |                                                                                                                                                                                                                                                                                                                                                                                                                                                   |
|------------------------------------------|---------------------------------------------------------------------------------------------------------------------------------------------------------------------------------------------------------------------------------------------------------------------------------------------------------------------------------------------------------------------------------------------------------------------------------------------------|
| Cancer type                              | Cutaneous Metastatic Melanoma, Stage III/IV                                                                                                                                                                                                                                                                                                                                                                                                       |
| Considerations related to:               |                                                                                                                                                                                                                                                                                                                                                                                                                                                   |
| Sex                                      | Cutaneous melanoma is more common in men compared to women. The incidence rate is 28.6 per 100,000 for males and 17.9 per 100,000 for females.                                                                                                                                                                                                                                                                                                    |
| Age                                      | The risk of melanoma increases with age. The median age of diagnosis for melanoma is 59.                                                                                                                                                                                                                                                                                                                                                          |
| Race/ethnicity                           | The incidence of cutaneous melanoma is significantly higher in people who are non-Hispanic white.                                                                                                                                                                                                                                                                                                                                                 |
| Geography                                | In the United States, melanoma accounts for about 5.0% of new cases of cancer. In 2023, the estimated number of new cases of melanoma was 97,610, and the estimated number of deaths was 7,990.                                                                                                                                                                                                                                                   |
| Overall representativeness of this study | This study enrolled more men than women (74% male), which is consistent with the higher incidence rate in men. The median age in our trial population was 71, which is slightly higher than the median age in the overall melanoma population, but comparable. All patients enrolled in the trial were non-Hispanic white, which is typical for the melanoma patient population, especially given the relatively small sample size of this study. |

**Supplementary Table S2. Representativeness of Study Participants.**
