# Supplementary material
Source: PubMed Central journal article supplement (PMC11062839)
Supplement: NIHMS1955233-supplement-8.pdf [file NIHMS1955233-supplement-8.pdf]

| Subject ID | Age | Sex | PET0 to Therapy Start (Days) | Therapy Start to PET1 (Days) | Δ Tumor SUV <sub>MAX</sub> (%) | Δ Tumor Size (%) | Δ Single Lesion SUV <sub>MAX</sub> (%) | Best Overall Response |
|------------|-----|-----|------------------------------|------------------------------|--------------------------------|------------------|----------------------------------------|-----------------------|
| 01         | 89  | M   | 21                           | 3                            | 24.4%                          | 5.8%             | 122.0%                                 | PR                    |
| 02         | 70  | M   | 2                            | 5                            | -1.8%                          | 0.0%             | 27.2%                                  | CR                    |
| 03         | 65  | M   | 0                            | 6                            | 114.1%                         | 1.3%             | 279.5%                                 | CR                    |
| 04         | 71  | M   | 0                            | 7                            | -62.8%                         | 2.9%             | -73.1%                                 | CR                    |
| 05         | 64  | M   | 8                            | 7                            | -70.7%                         | -5.9%            | -70.7%                                 | CR                    |
| 06         | 76  | F   | 0                            | 7                            | 29.4%                          | -4.3%            | 33.1%                                  | CR                    |
| 07         | 75  | F   | 24                           | 8                            | 8.1%                           | -10.0%           | 8.1%                                   | CR                    |
| 08         | 42  | F   | 12                           | 8                            | -32.2%                         | -2.4%            | -32.2%                                 | PR                    |
| 09         | 67  | M   | 0                            | 12                           | 78.4%                          | 0.0%             | 208.9%                                 | CR                    |
| 10         | 84  | M   | 0                            | 13                           | -45.6%                         | -7.7%            | -56.4%                                 | PR                    |
| 11         | 72  | M   | 0                            | 14                           | 37.0%                          | 0.0%             | 42.3%                                  | PR                    |
| 12         | 24  | M   | 12                           | 6                            | 59.0%                          | 27.3%            | 59.0%                                  | PD                    |
| 13         | 64  | M   | 21                           | 6                            | 13.3%                          | 10.0%            | 13.3%                                  | PD                    |
| 14         | 53  | M   | 12                           | 6                            | 1.9%                           | 8.6%             | 34.7%                                  | PD                    |
| 15         | 78  | M   | 0                            | 6                            | -7.3%                          | 0.0%             | -31.0%                                 | PD                    |
| 16         | 82  | M   | 9                            | 7                            | 3.9%                           | 5.3%             | 58.2%                                  | PD                    |
| 17         | 76  | M   | 12                           | 8                            | -8.0%                          | 1.7%             | -20.2%                                 | pNR                   |
| 18         | 84  | F   | 13                           | 11                           | -4.2%                          | 16.0%            | -25.8%                                 | PD                    |
| 19         | 68  | F   | 17                           | 21                           | 57.8%                          | 8.3%             | 57.8%                                  | PD                    |

**Supplementary Table S3. PET imaging results and response assessments for all patients.** Data is stratified by response and by the post-treatment scan interval. Percentage change between PET0 and PET1 for Tumor SUV<sub>MAX</sub> and Tumor Size was calculated using up to 5 target lesions. Percentage change between PET0 and PET1 for Single Lesion SUV<sub>MAX</sub> was calculated using the largest change in a single FDG-avid tumor lesion. The best overall response was assessed over the course of study participation on standard-of-care imaging (CT, MRI, or FDG PET/CT) acquired at baseline and then every 3 months using RECIST 1.1. For patient 17, pathologic response was used. Patients with a metabolic flare (>70% increase in Tumor SUV<sub>MAX</sub>) are indicated in orange, patients with a metabolic response (>30% decrease in Tumor SUV<sub>MAX</sub>) in green, and patients with progressive disease in gray. ECOG PS = Eastern Cooperative Oncology Group Performance Status; CR = complete response; PR = partial response; PD = progressive disease; pNR = pathologic non-response.
